# Supplementary material for: Correlations of Genotype with Climate Parameters Suggest Caenorhabditis elegans Niche Adaptations
Source: PubMed Central journal article supplement (PMC5217117; doi:10.1534/g3.116.035162), 2016-11-17

**Figure S1. Genome-wide association of all significant geographic, weather, and climate traits.** Genome-wide association of various geographic and weather traits are visualized as Manhattan plots (A), phenotypic split by genotype (B), and linkage-disequilibrium plots (C). A) Genomic position is plotted on the x-axis against the negative log-transformed  $p$ -value on the y-axis. SNVs that are above the Bonferroni-corrected significance threshold, indicated by the dotted grey line, are shown in red and SNVs below the Bonferroni threshold are shown in black. Confidence intervals are represented by the pink bars. B) Box plots show range of phenotypic values separated by genotype at the peak marker locus. The reference genotype (REF) refers to isotypes that share the genotype of the reference isotype, N2. The alternative genotype (ALT) refers to all other isotypes. C) Heat map displays the linkage disequilibrium (LD) between each QTL present in the mappings. Red is in high LD, white is low. QTL with an LD of less than 0.5 are presumed to be distinct QTL.

# Elevation (m)

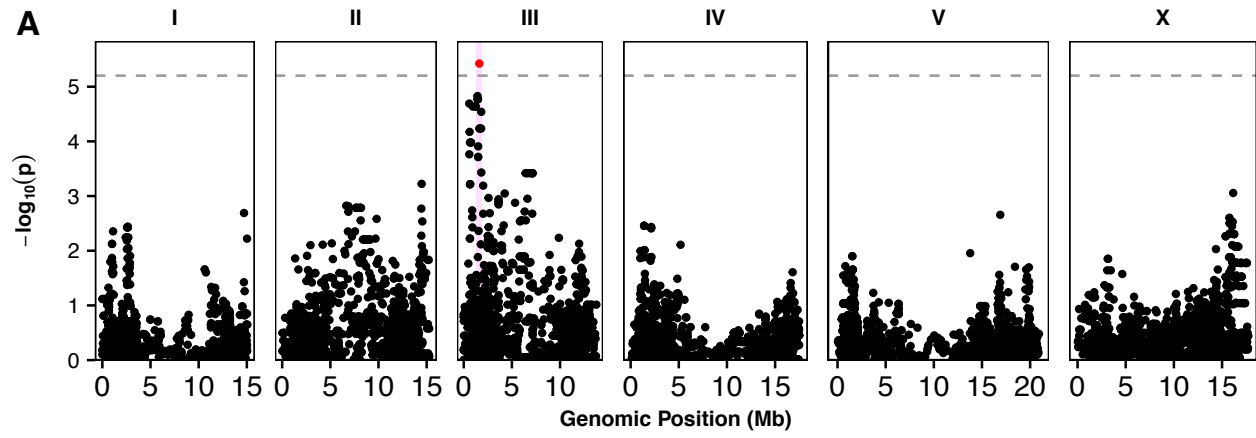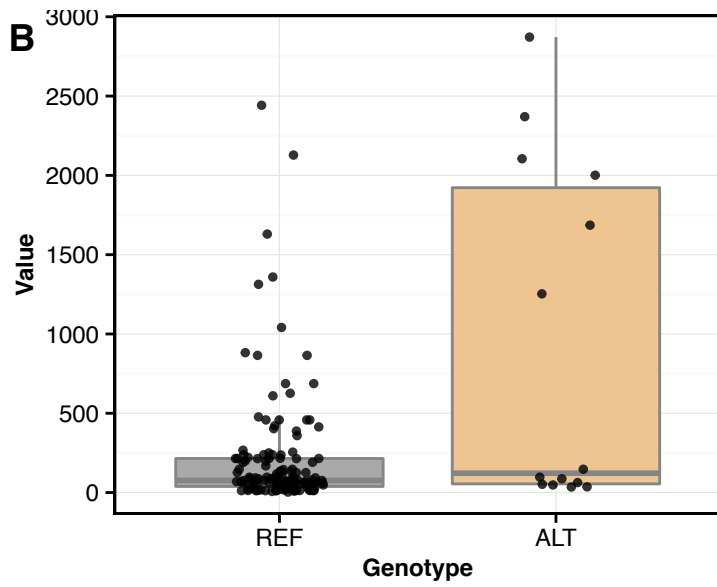

## Average Daily Relative Humidity (%) [3 months]

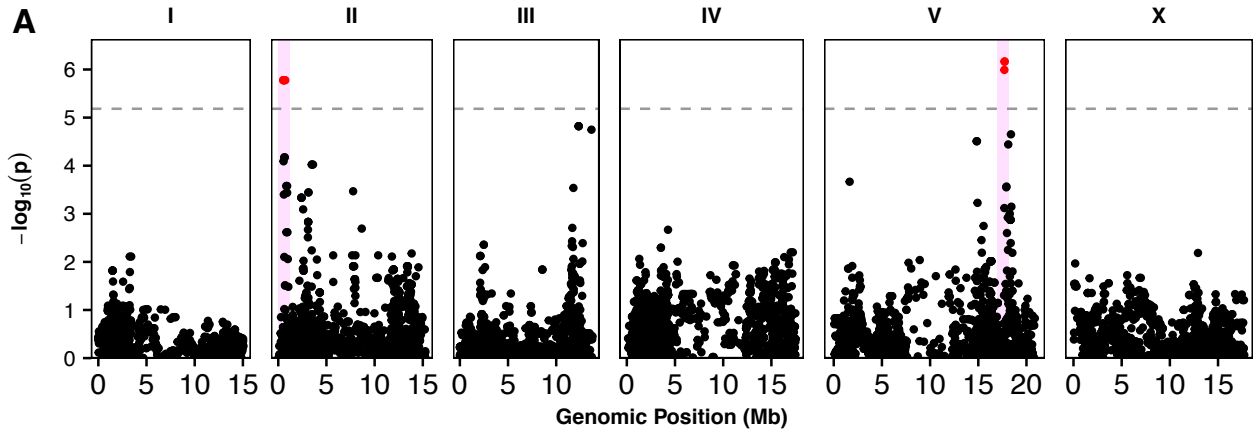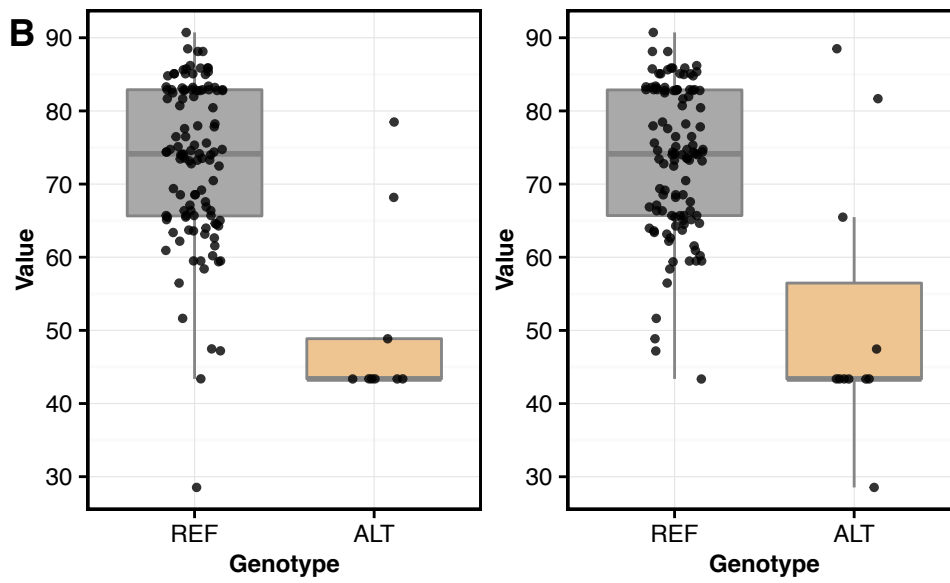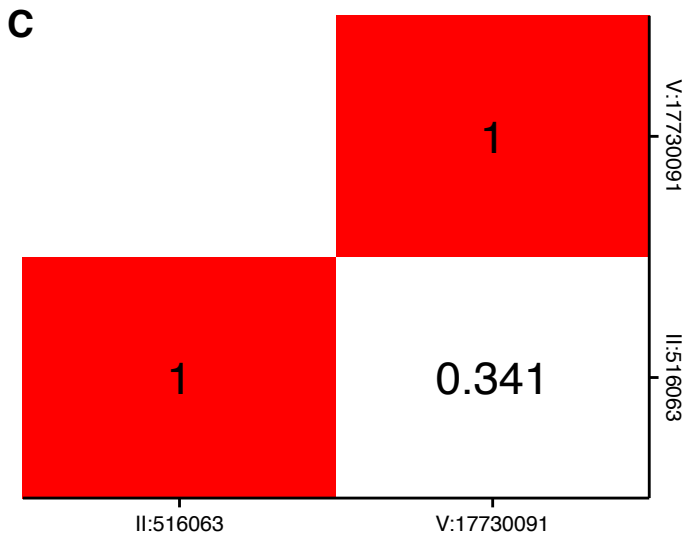

## Maximum Daily Relative Humidity (%) [3 months]

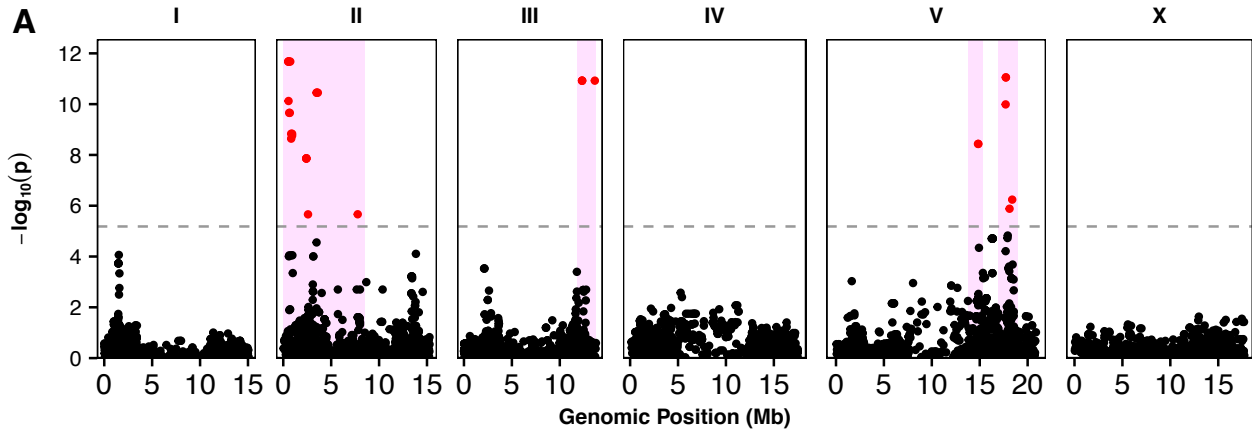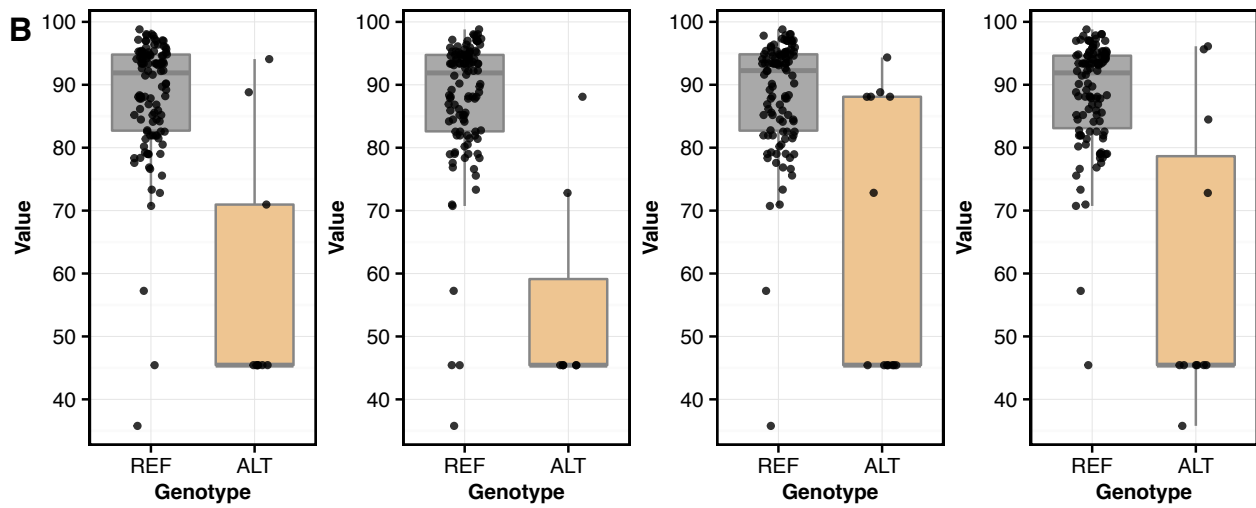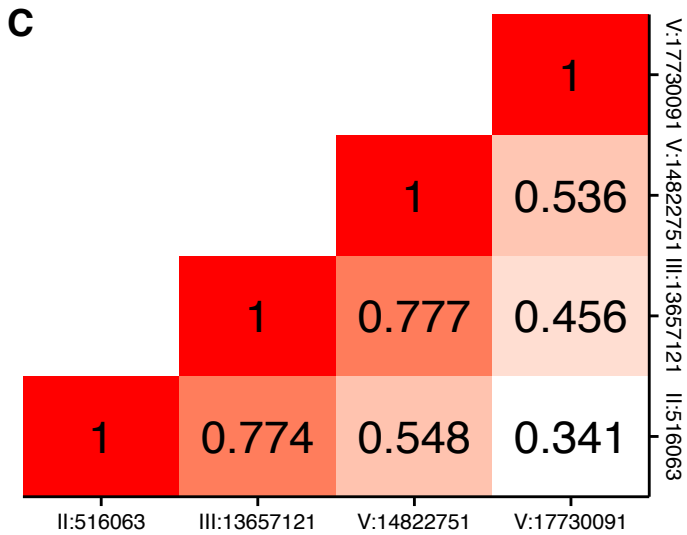

### Variance of Relative Humidity [3 months]

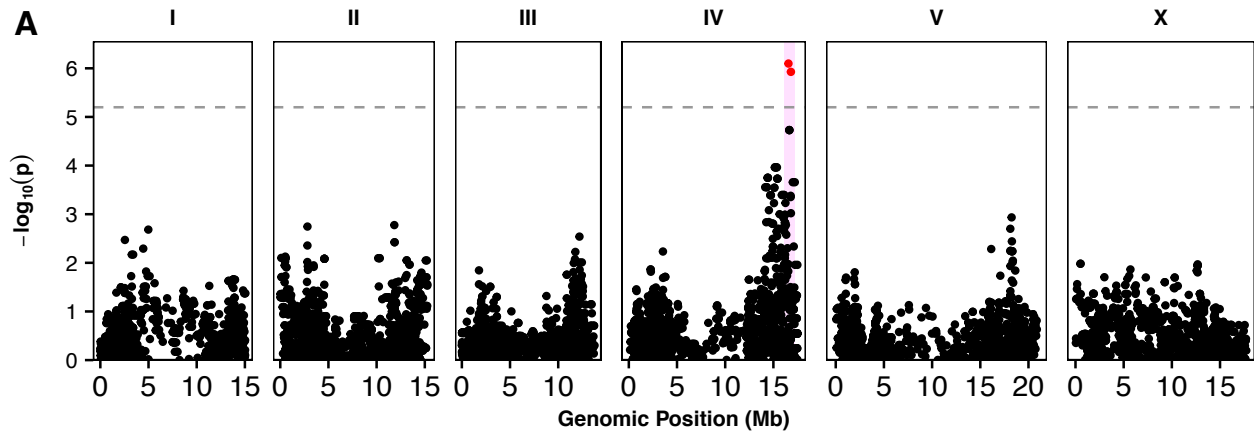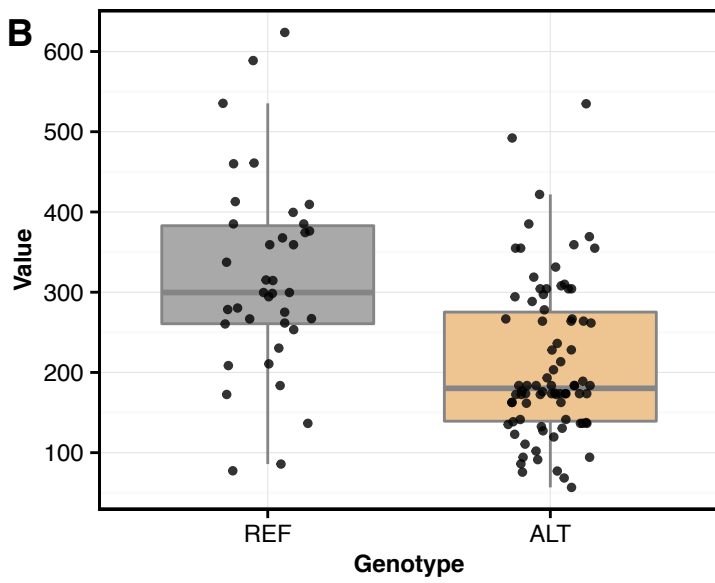

### Variance of Wind Direction [3 months]

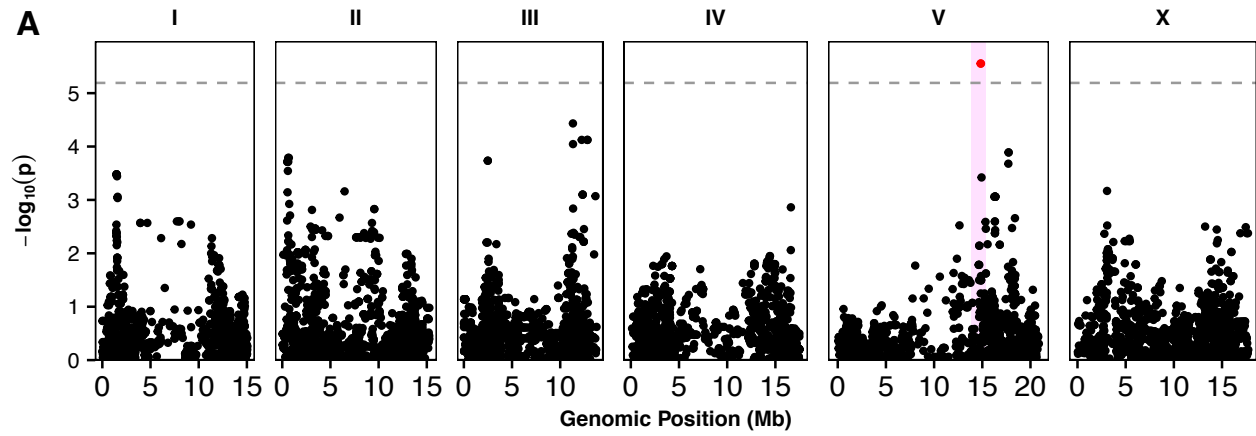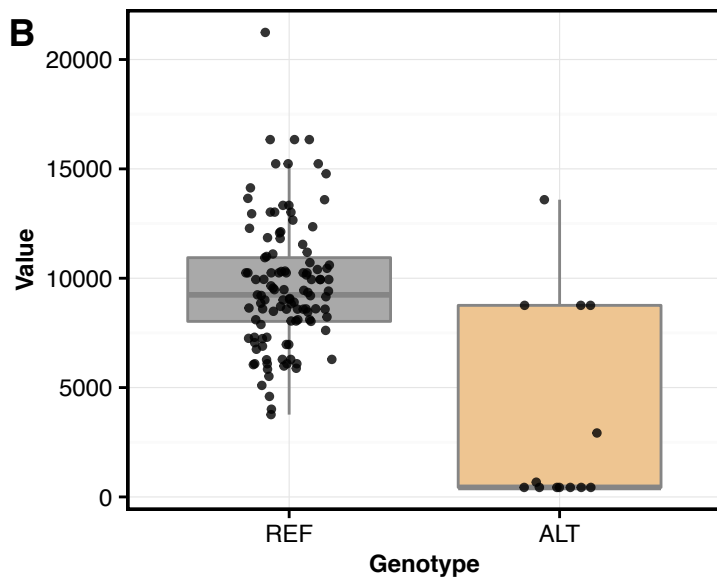

# Maximum Daily Wind Speed (m/s) [3 months]

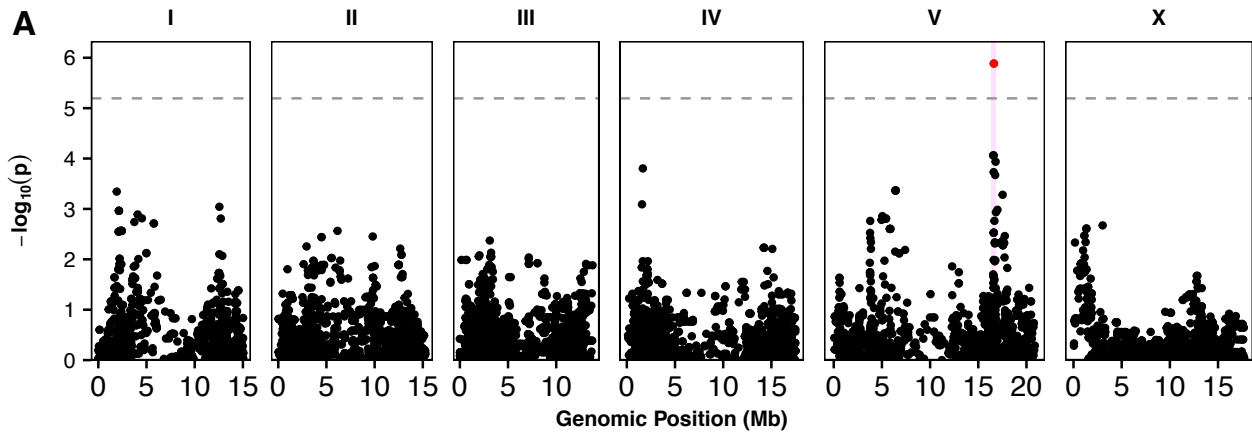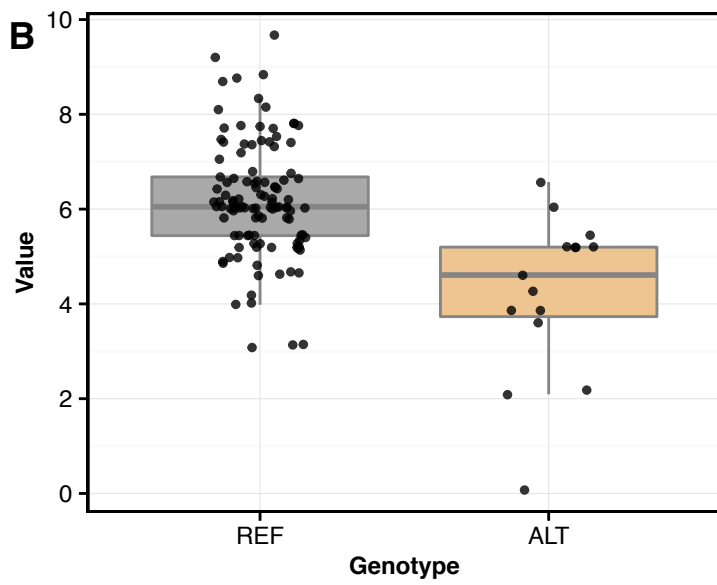

# Maximum Daily Cloud Height (m) [1 year]

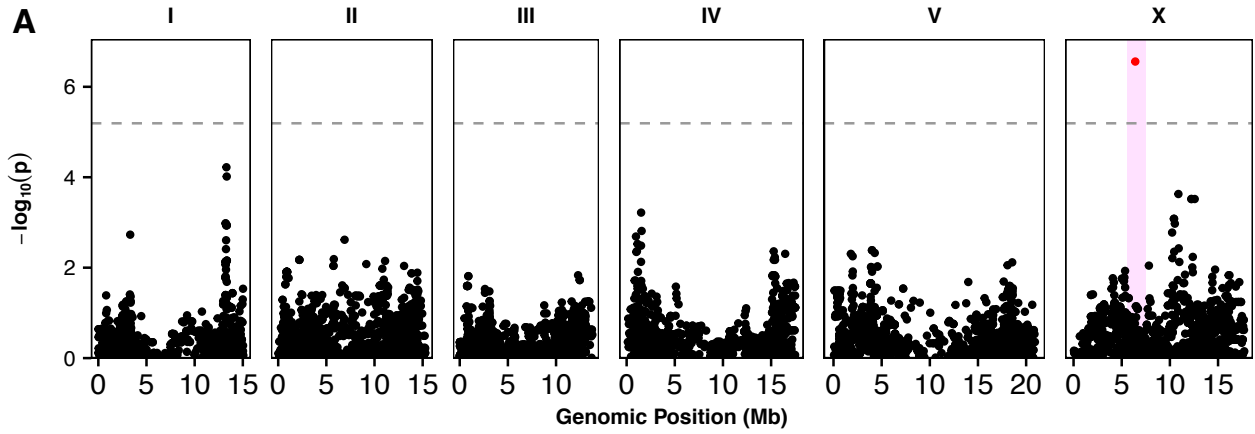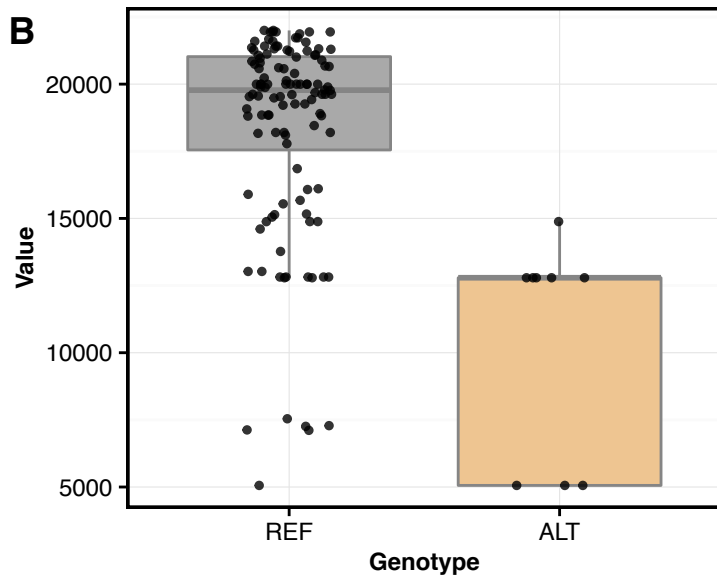



## Average Daily Relative Humidity (%) [1 year]

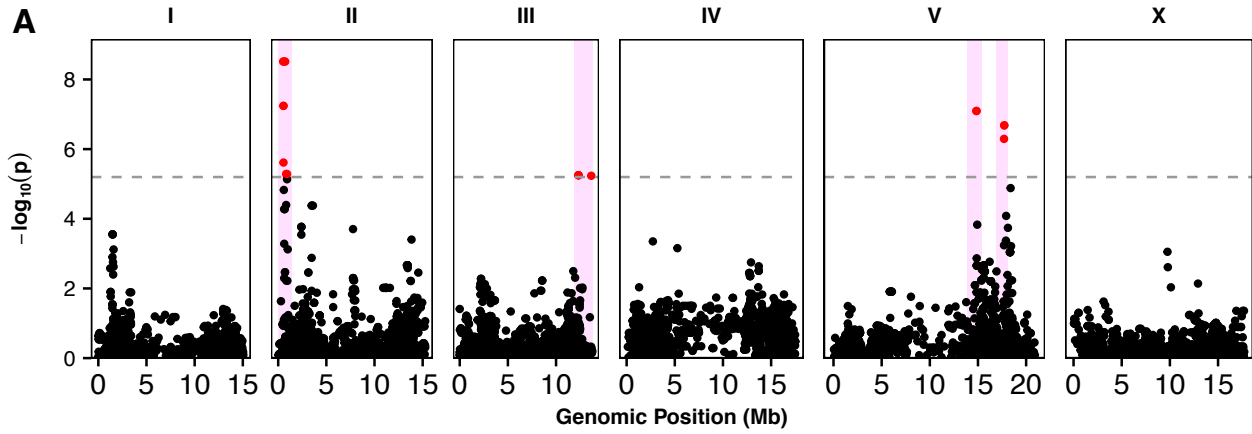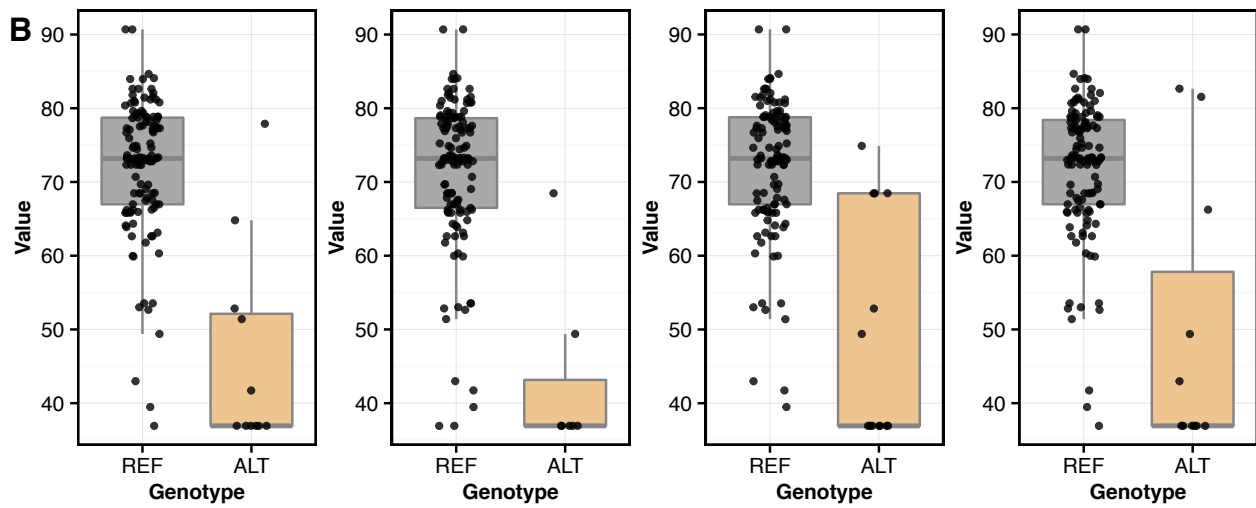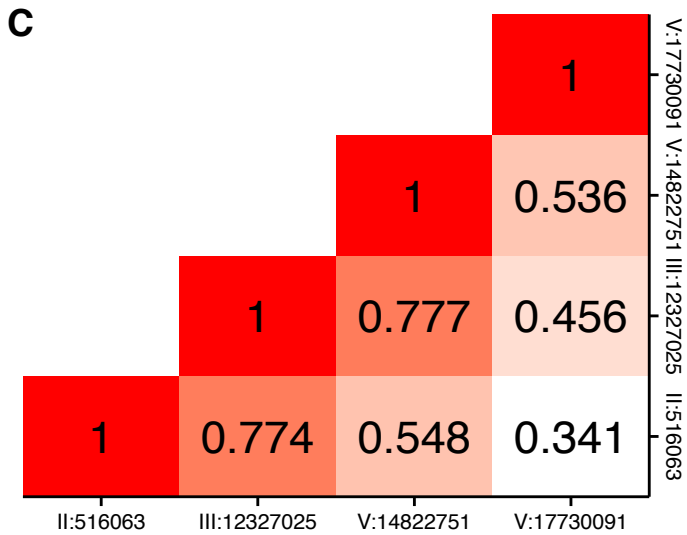

## Maximum Daily Relative Humidity (%) [1 year]

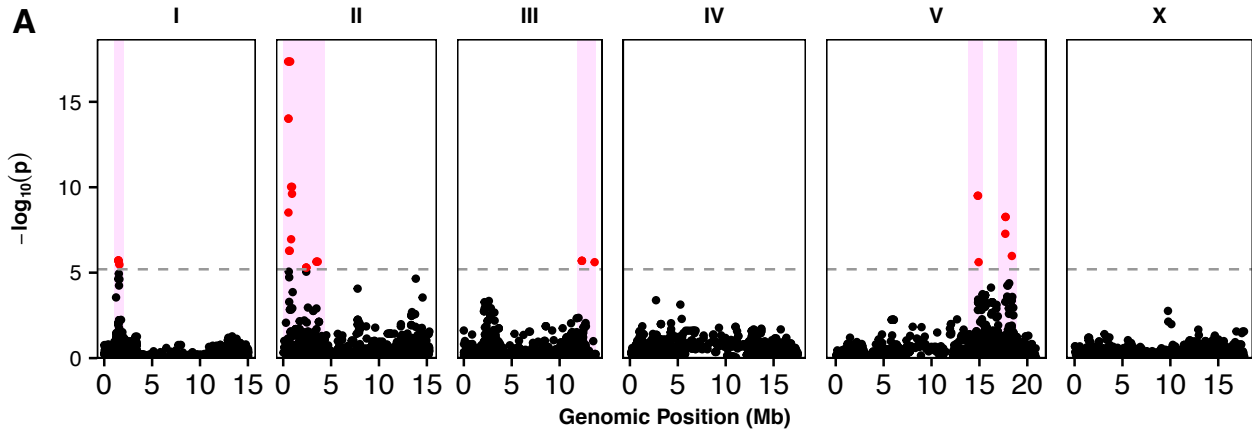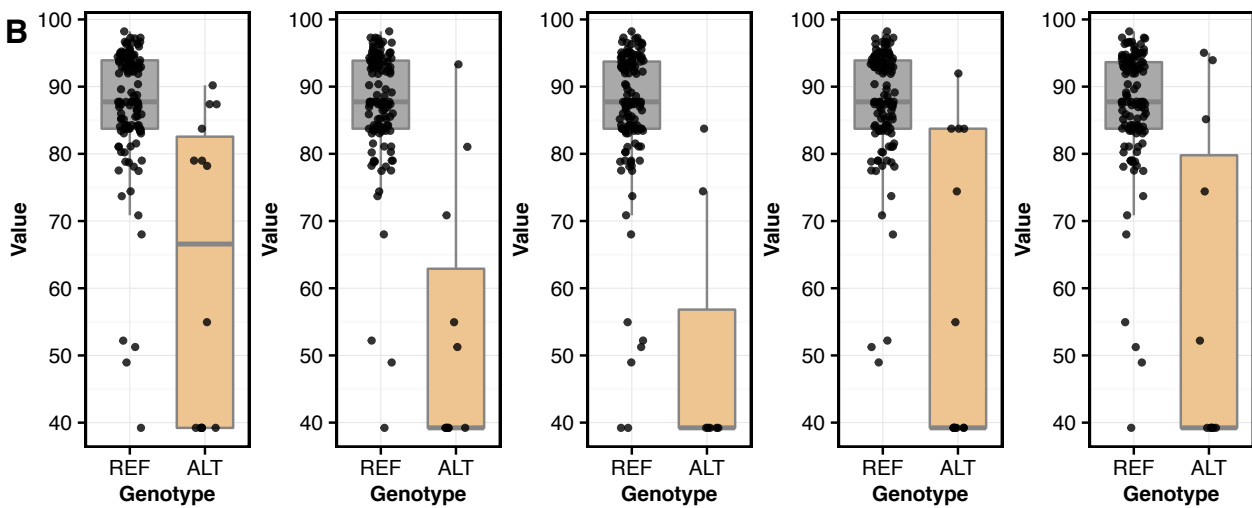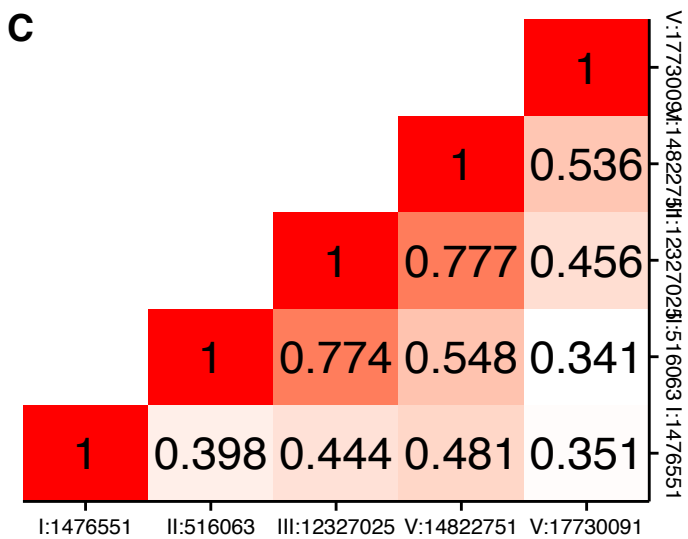

# Variance of Relative Humidity [1 year]

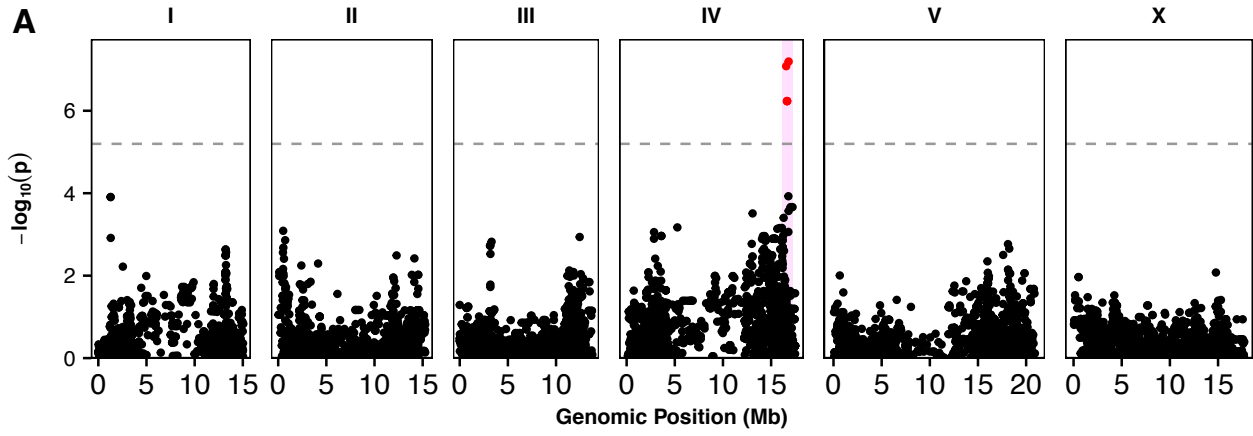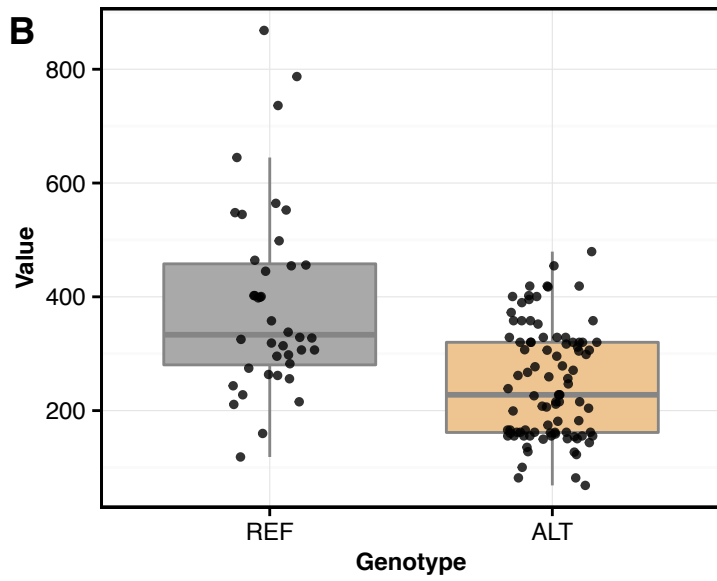

### Variance of Temperature [1 year]

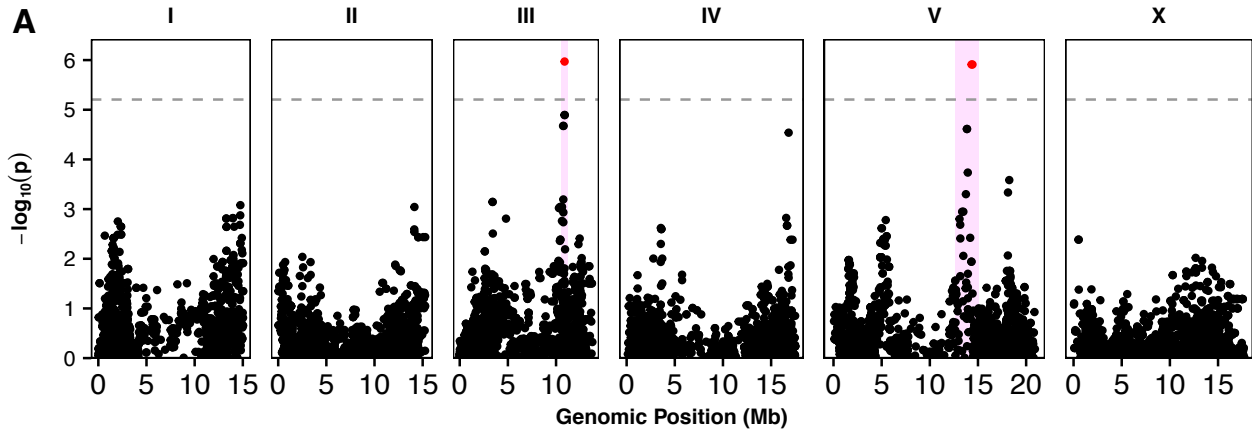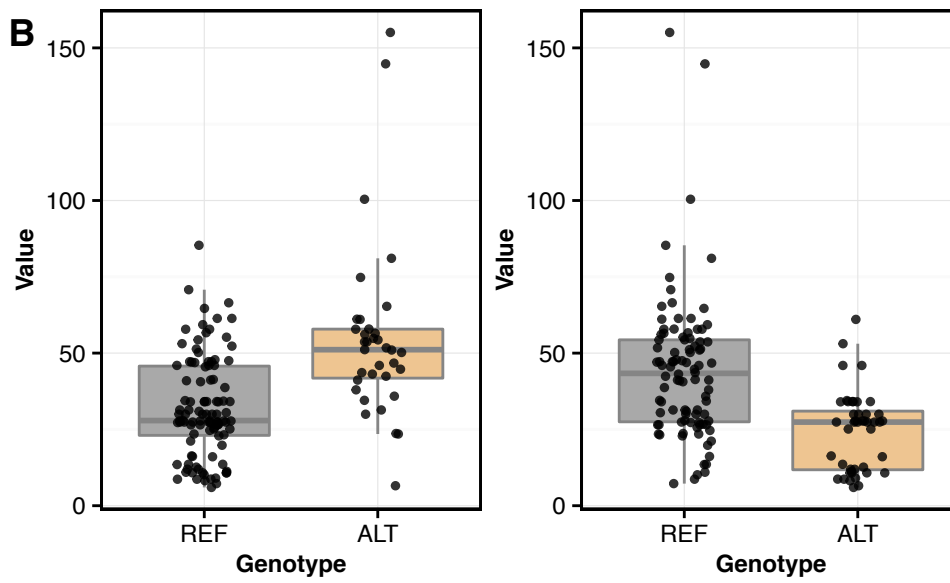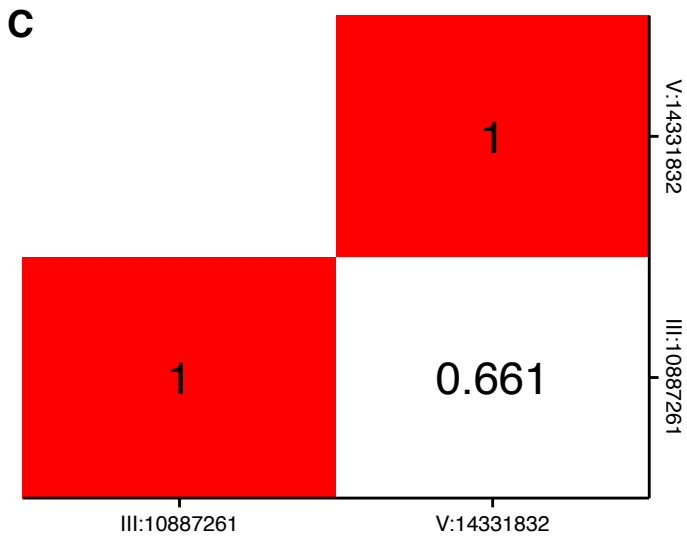

# Maximum Daily Wind Direction (Degrees) [1 year]

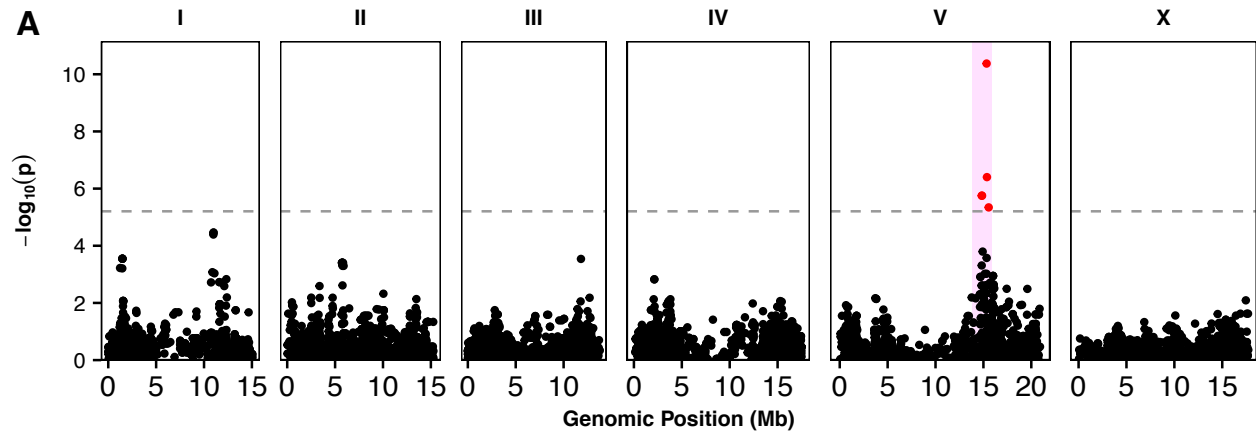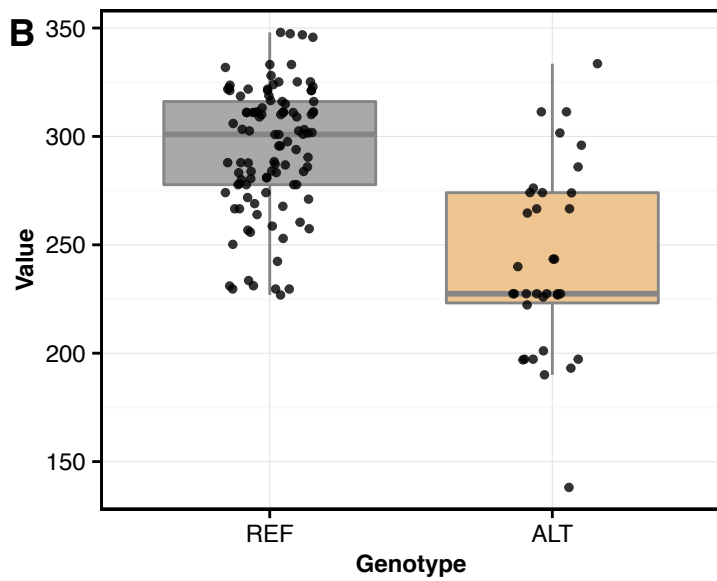

### Variance of Wind Direction [1 year]

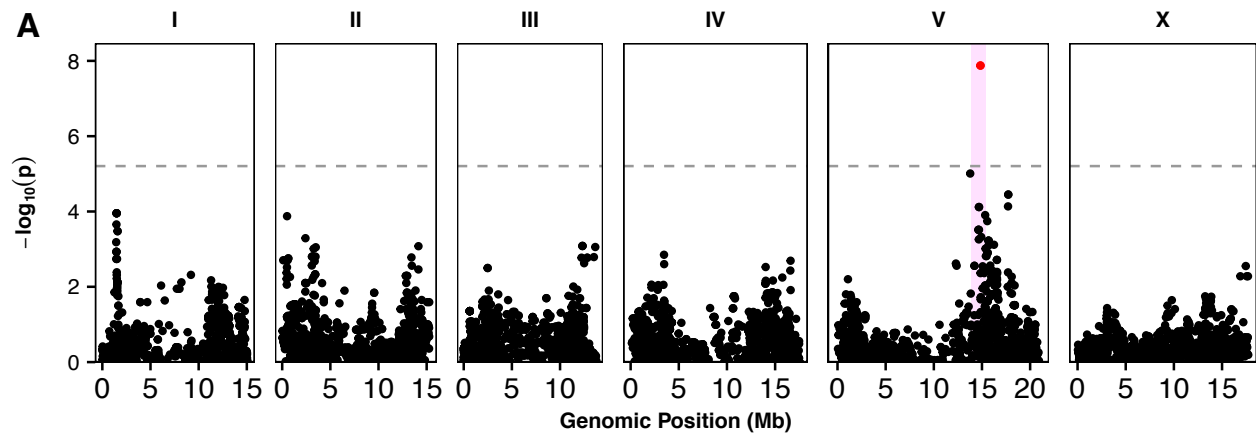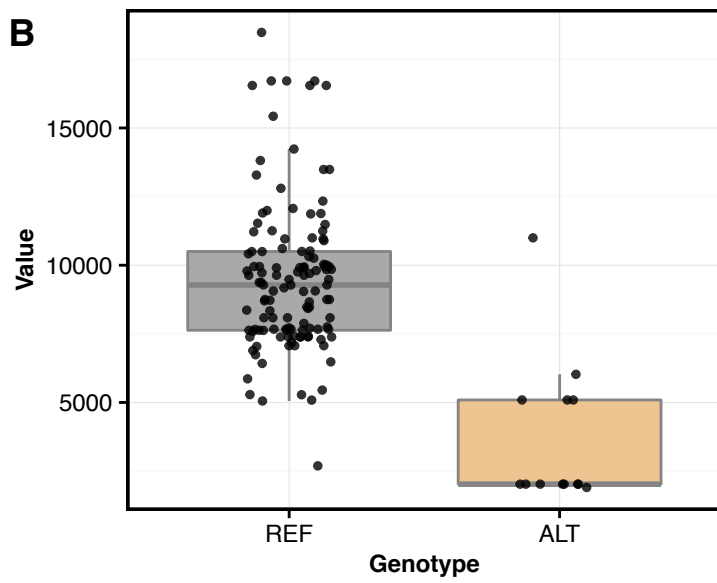

# Variance of Wind Speed [1 year]

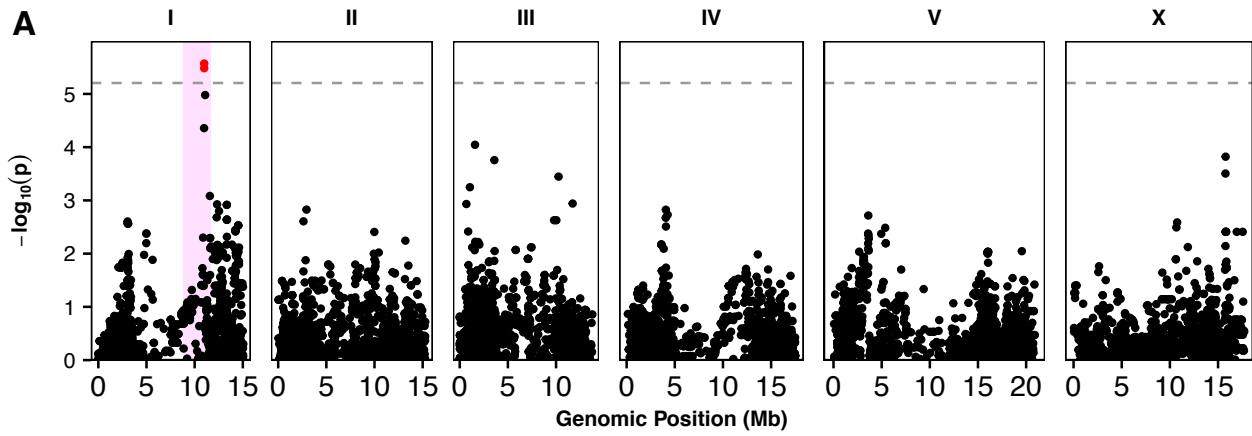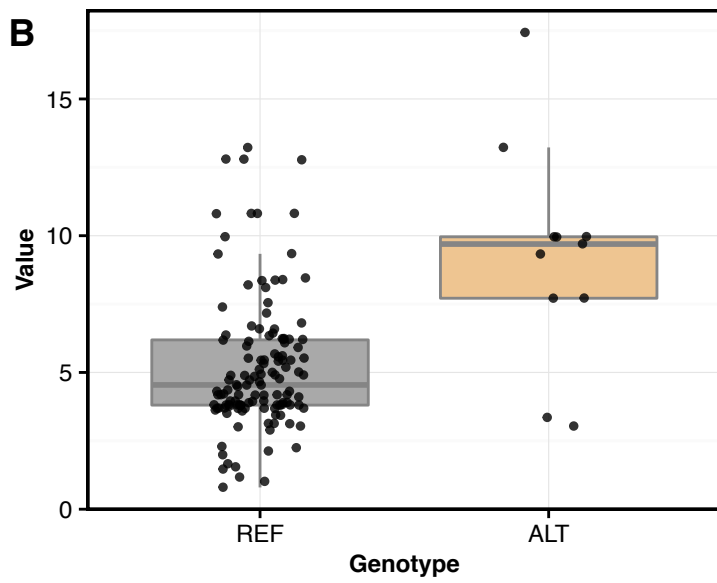

### Maximum Daily Dew Point (C) [3 years]

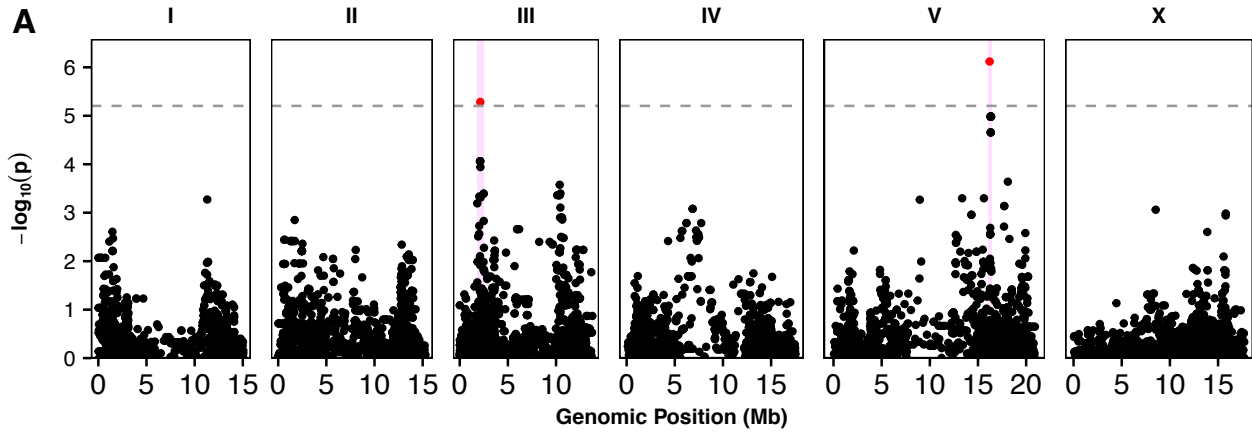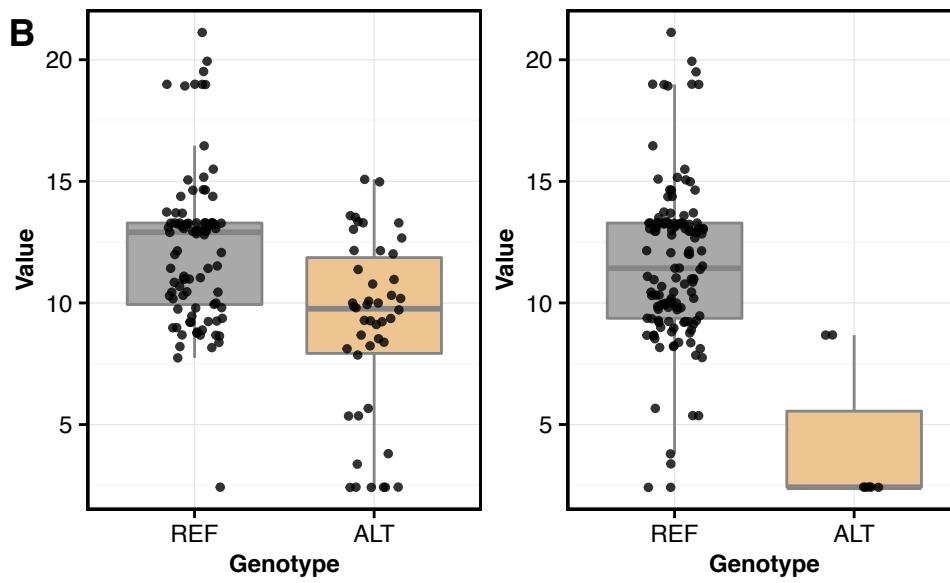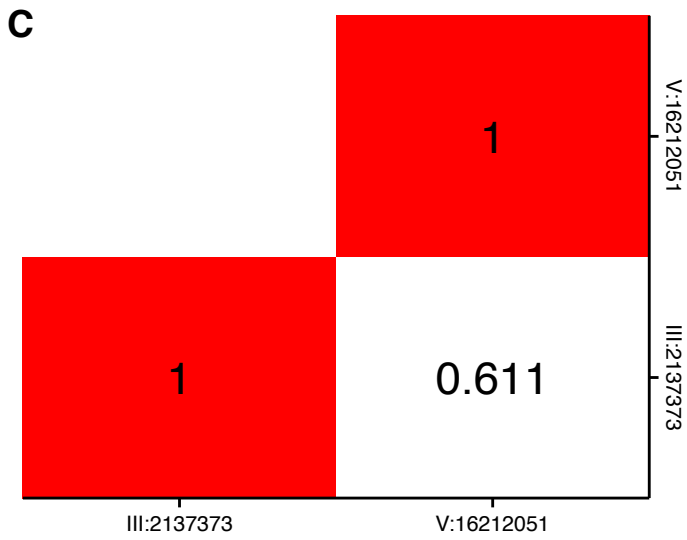



# Variance of Dew Point [3 years]

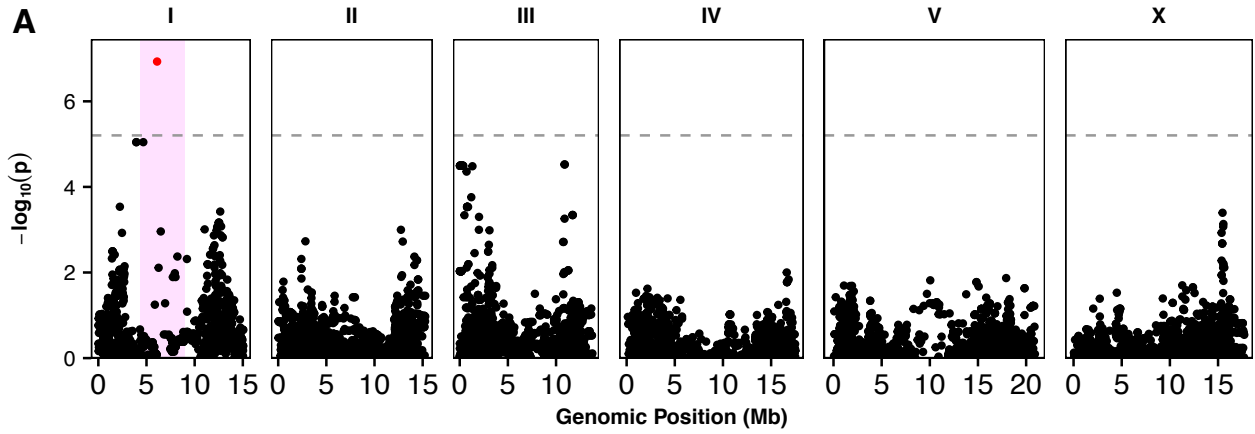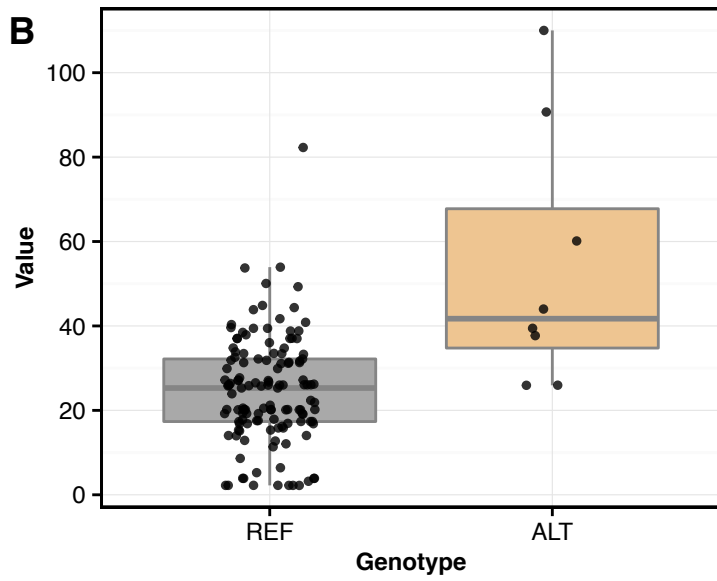

### Average Daily Relative Humidity (%) [3 years]

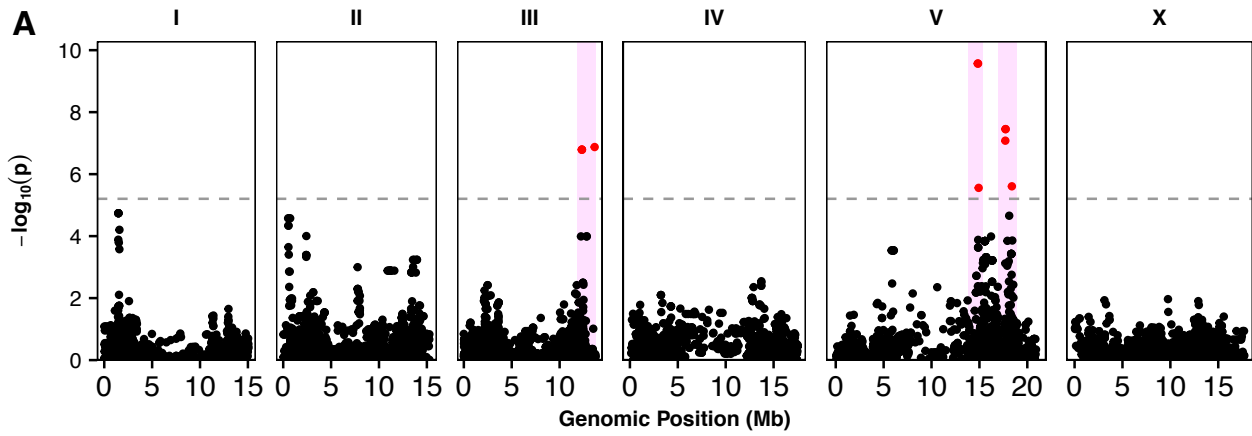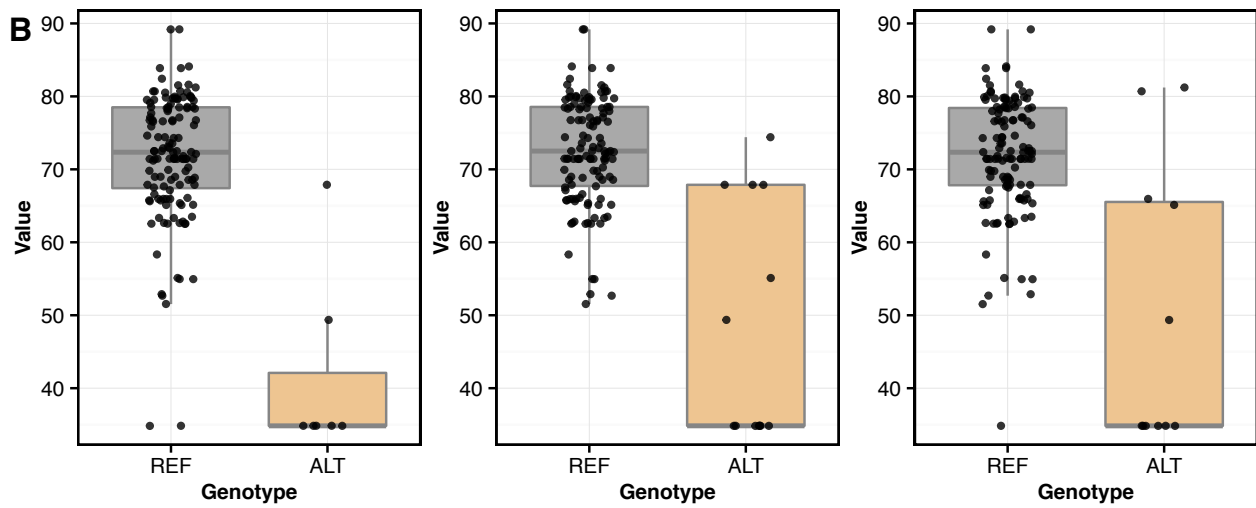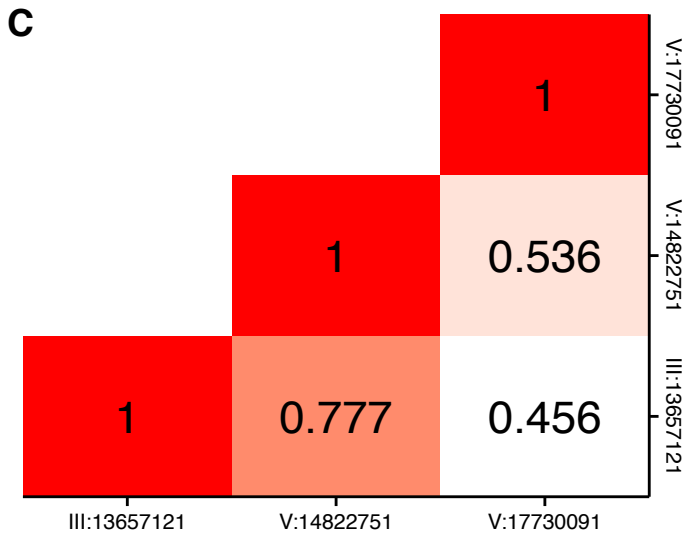

### Maximum Daily Relative Humidity (%) [3 years]

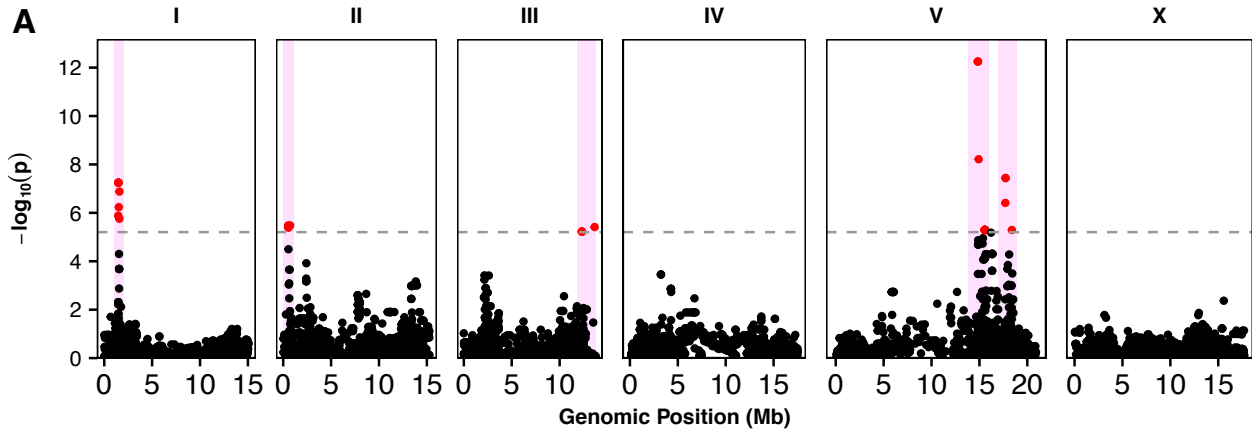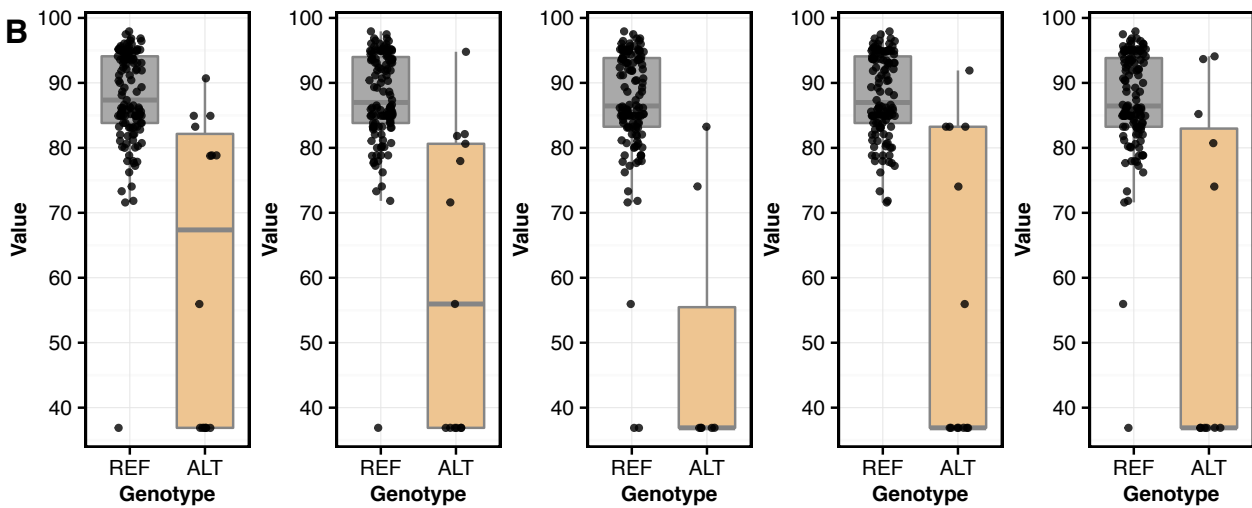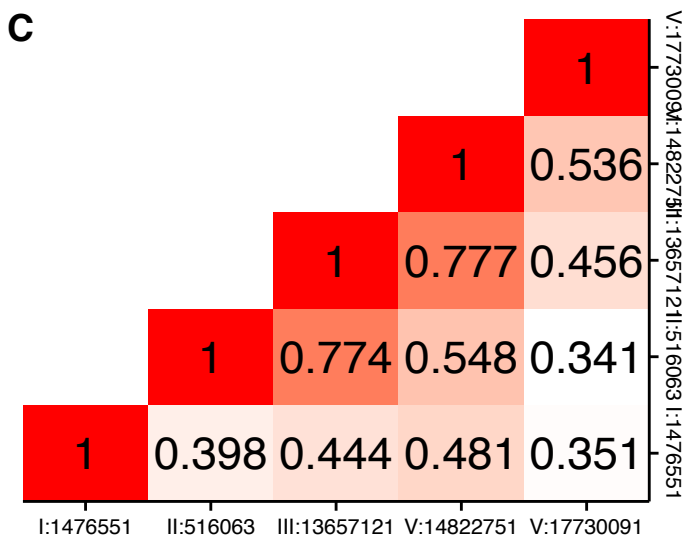

### Average Daily Temperature (C) [3 years]

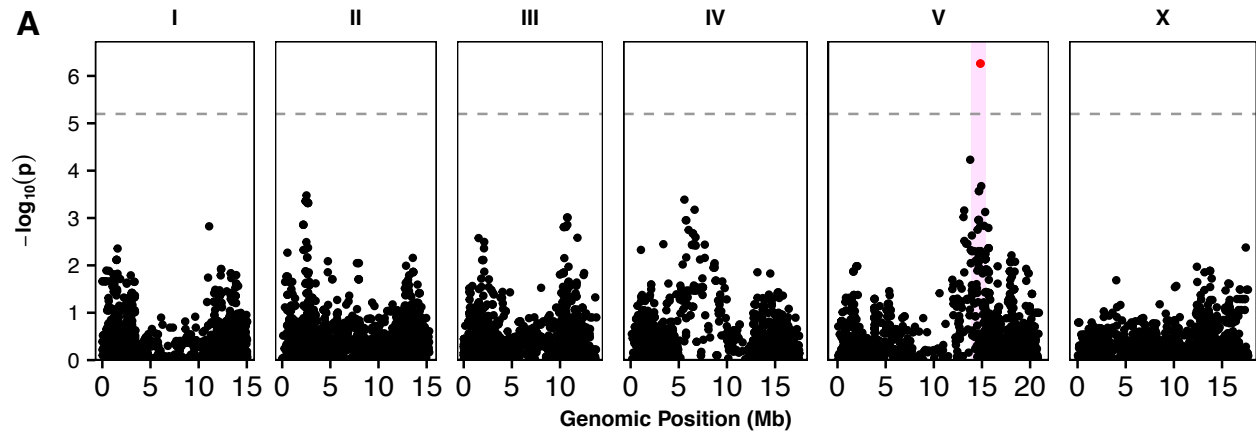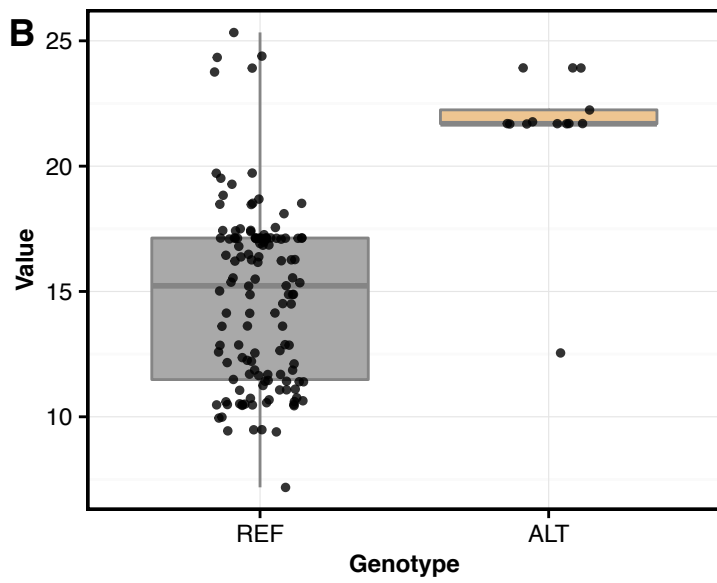

# Minimum Daily Temperature (C) [3 years]

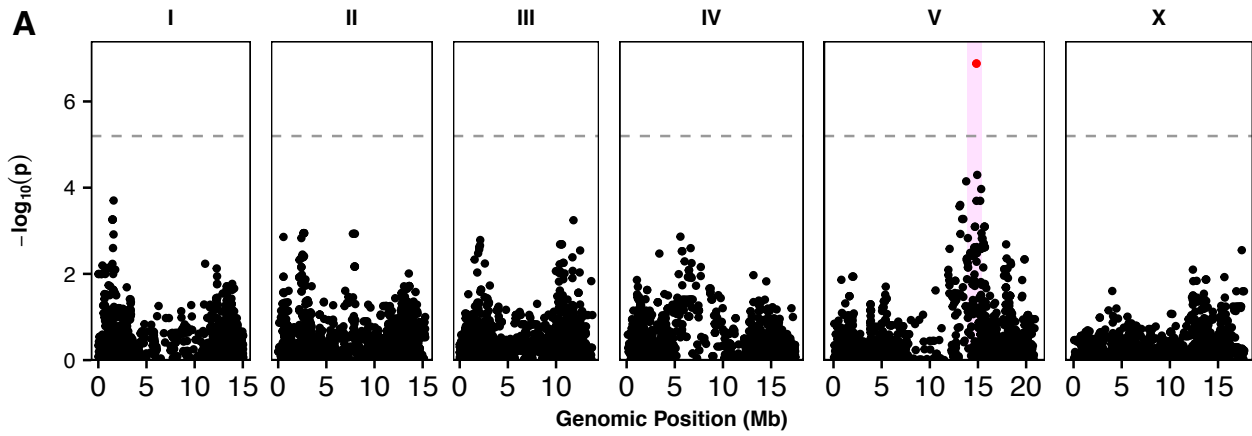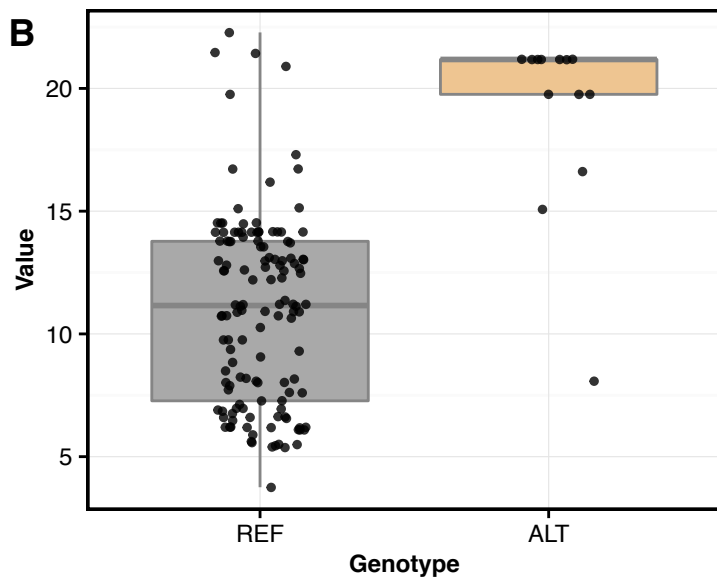

### Variance of Temperature [3 years]

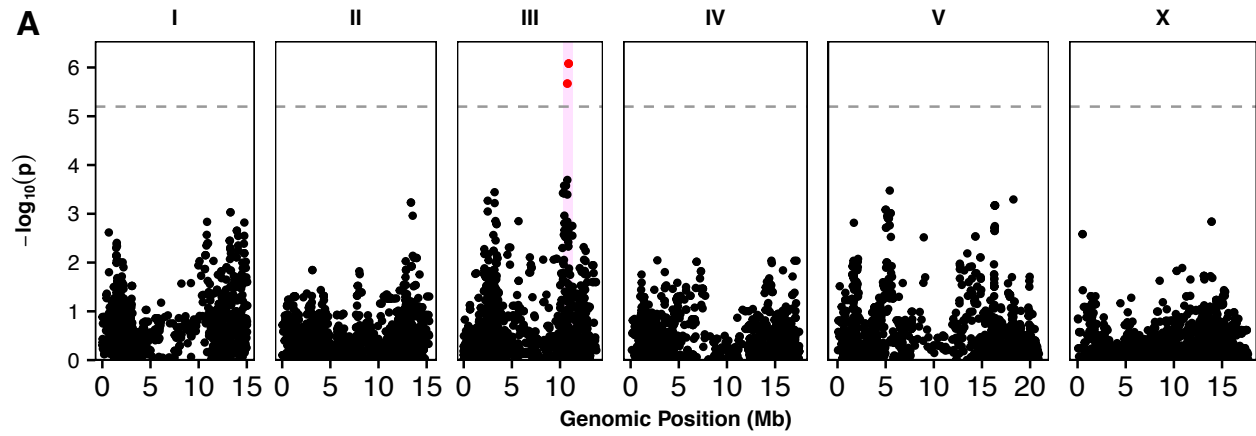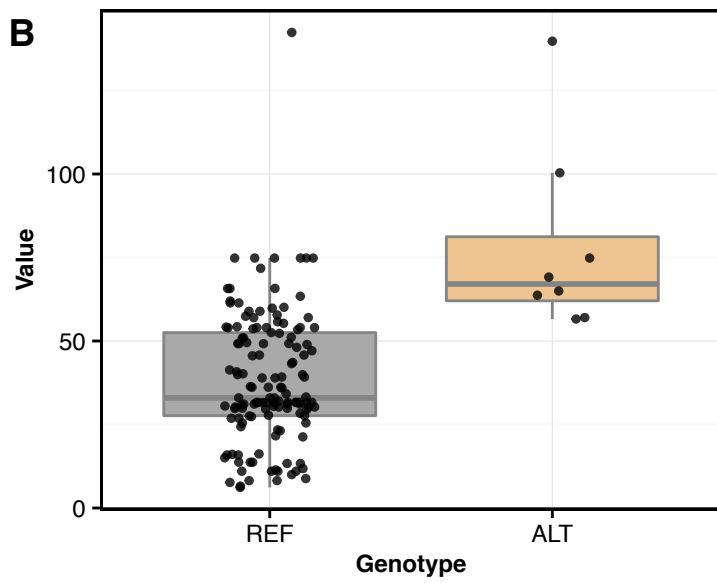

# Maximum Daily Wind Direction (Degrees) [3 years]

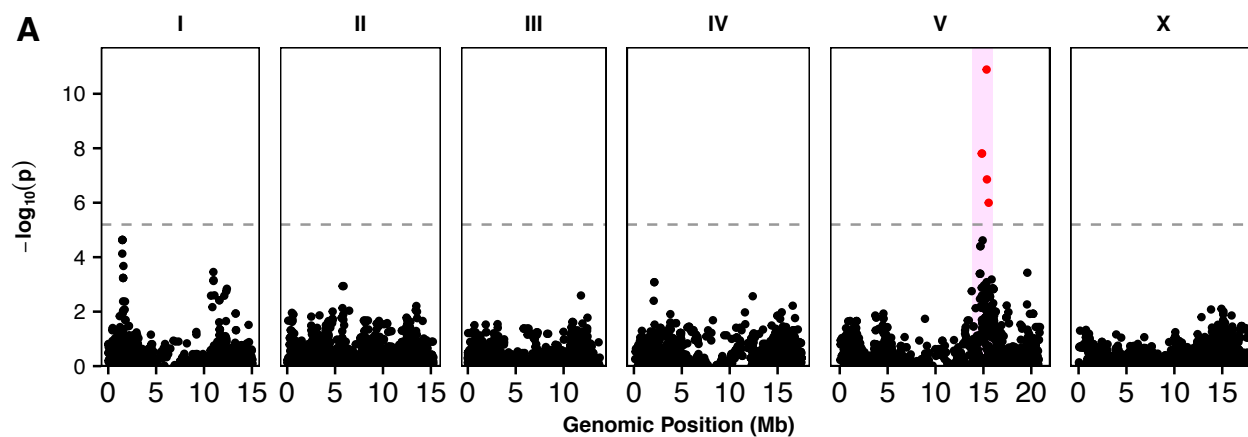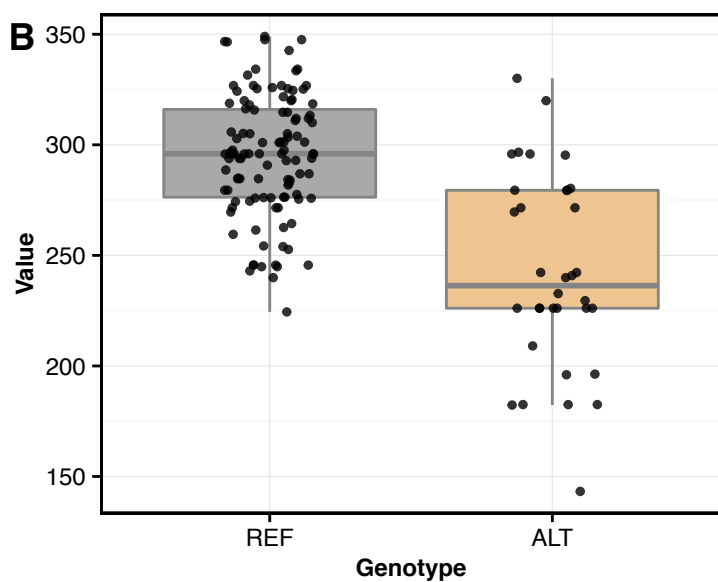

# Variance of Wind Direction [3 years]

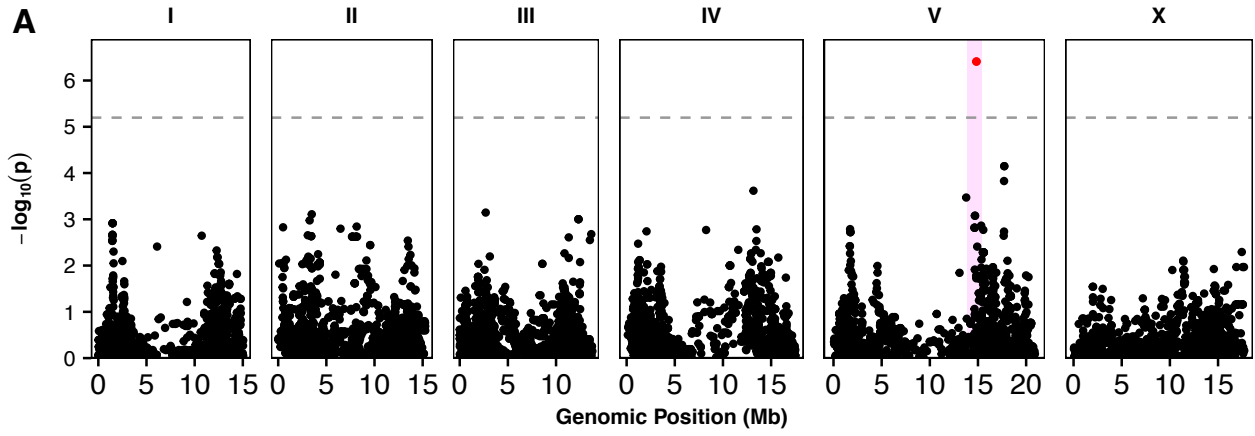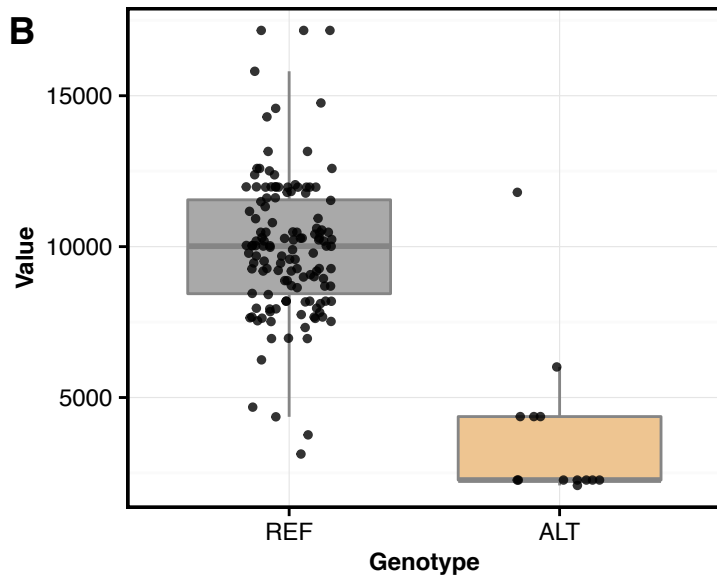



# Variance of Wind Speed [3 years]

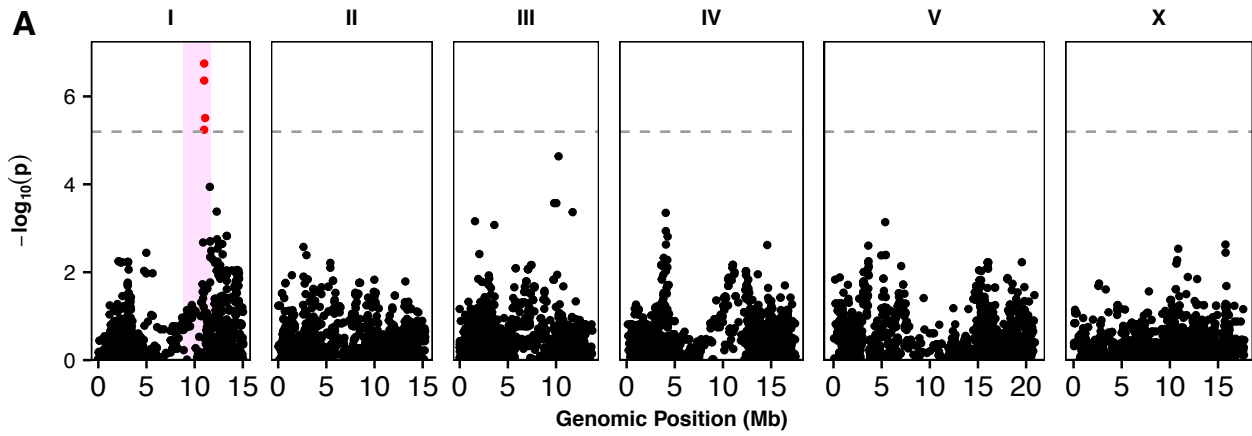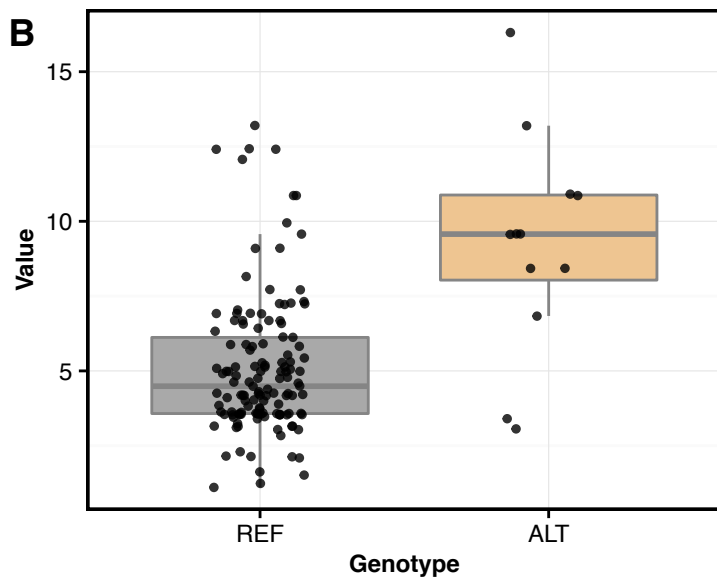

Supplement: 289FigureS1.pdf [file 289FigureS1.pdf]
